# Supplementary material for: Genetic loci associated with coronary artery disease harbor evidence of selection and antagonistic pleiotropy
Source: PubMed Central journal article supplement (PMC5480811; doi:10.1371/journal.pgen.1006328), 2017-06-22
Supplement: pgen.1006328.s004.pdf [file pgen.1006328.s004.pdf]

**Table S1. Selected Enrichr analysis outputs for top 10-ranked CAD genes with highest genetic risk-selection associations from Fig. 1B.** Enrichr outputs includes KEGG 2016 Pathways (<http://www.kegg.jp/kegg/download/>), MGI Mammalian Phenotype Level 3 (<http://www.informatics.jax.org/>), Cancer Cell Line Encyclopaedia (<http://portals.broadinstitute.org/ccle/data/browseData>), and ChEA 2015 (<http://amp.pharm.mssm.edu/lib/cheadownload.jsp>).

### PATHWAYS - KEGG 2016 Pathways

| Index | Name                                                         | P-value   | Adjusted p-value | Z-score | Combined score |
|-------|--------------------------------------------------------------|-----------|------------------|---------|----------------|
| 1     | Bile secretion_Homo sapiens_hsa04976                         | 0.0006325 | 0.008222         | -1.77   | 8.48           |
| 2     | Ovarian steroidogenesis_Homo sapiens_hsa04913                | 0.02878   | 0.07482          | -1.85   | 4.79           |
| 3     | Fat digestion and absorption_Homo sapiens_hsa04975           | 0.02374   | 0.07482          | -1.76   | 4.57           |
| 4     | Nicotinate and nicotinamide metabolism_Homo sapiens_hsa00760 | 0.01700   | 0.07482          | -1.75   | 4.53           |
| 5     | Aldosterone synthesis and secretion_Homo sapiens_hsa04925    | 0.04596   | 0.09556          | -1.87   | 4.39           |
| 6     | ABC transporters_Homo sapiens_hsa02010                       | 0.02542   | 0.07482          | -1.65   | 4.28           |
| 7     | Toxoplasmosis_Homo sapiens_hsa05145                          | 0.06617   | 0.09558          | -1.71   | 4.01           |
| 8     | Hepatitis C_Homo sapiens_hsa05160                            | 0.07427   | 0.09655          | -1.61   | 3.76           |
| 9     | Pyrimidine metabolism_Homo sapiens_hsa00240                  | 0.05911   | 0.09558          | -1.60   | 3.75           |
| 10    | mRNA surveillance pathway_Homo sapiens_hsa03015              | 0.05145   | 0.09556          | -1.56   | 3.66           |

### ONTOLOGIES - MGI Mammalian Phenotype Level 3

| Index | Name                                   | P-value  | Adjusted p-value | Z-score | Combined score |
|-------|----------------------------------------|----------|------------------|---------|----------------|
| 1     | IGR1_SKIN                              | 0.002319 | 0.1055           | -1.95   | 4.38           |
| 2     | HEYA8_OVARY                            | 0.03735  | 0.1638           | -2.31   | 4.18           |
| 3     | OVK18_OVARY                            | 0.003838 | 0.1055           | -1.79   | 4.03           |
| 4     | HTK_HAEMATOPOIETIC_AND_LYMPHOID_TISSUE | 0.03195  | 0.1638           | -2.13   | 3.85           |
| 5     | HS944T_SKIN                            | 0.04174  | 0.1638           | -2.08   | 3.76           |
| 6     | MFE296_ENDOMETRIUM                     | 0.04564  | 0.1638           | -2.05   | 3.71           |
| 7     | HS746T_STOMACH                         | 0.05146  | 0.1638           | -2.03   | 3.67           |
| 8     | WM983B_SKIN                            | 0.05724  | 0.1638           | -1.96   | 3.54           |
| 9     | NCIH650_LUNG                           | 0.08805  | 0.1638           | -1.95   | 3.53           |
| 10    | TE10_OESOPHAGUS                        | 0.05387  | 0.1638           | -1.94   | 3.51           |

## CELL TYPES - Cancer Cell Line Encyclopedia

| Index | Name                                     | P-value  | Adjusted p-value | Z-score | Combined score |
|-------|------------------------------------------|----------|------------------|---------|----------------|
| 1     | MP0000003_abnormal_adipose_tissue_       | 0.01005  | 0.1061           | -2.31   | 5.19           |
| 2     | MP0003718_maternal_effect_               | 0.01434  | 0.1061           | -2.10   | 4.71           |
| 3     | MP0005395_other_phenotype_               | 0.01434  | 0.1061           | -1.88   | 4.21           |
| 4     | MP0002139_abnormal_hepatobiliary_system_ | 0.005946 | 0.1061           | -1.86   | 4.16           |
| 5     | MP0009389_abnormal_extracutaneous_pigme_ | 0.03729  | 0.1769           | -1.87   | 3.23           |
| 6     | MP0002168_other_aberrant_phenotype_      | 0.03869  | 0.1769           | -1.67   | 2.90           |
| 7     | MP0001764_abnormal_homeostasis_          | 0.01658  | 0.1061           | -1.22   | 2.74           |
| 8     | MP0005501_abnormal_skin_physiology_      | 0.05987  | 0.2395           | -1.60   | 2.29           |
| 9     | MP0000358_abnormal_cell_content/_        | 0.07746  | 0.2680           | -1.41   | 1.86           |
| 10    | MP0005253_abnormal_eye_physiology_       | 0.09214  | 0.2680           | -1.37   | 1.81           |

## TRANSCRIPTION - ChEA 2015

| Index | Name                                          | P-value     | Adjusted p-value | Z-score | Combined score |
|-------|-----------------------------------------------|-------------|------------------|---------|----------------|
| 1     | CTNNB1_20460455_ChIP-Seq_HCT116_Human         | 4.305e-7    | 0.00005554       | -2.06   | 20.15          |
| 2     | TRIM28_17542650_ChIP-ChIP_NTera2_Human        | 0.4994      | 0.5017           | -24.98  | 17.23          |
| 3     | ESR1_20079471_ChIP-ChIP_T-47D_Human           | 0.0007167   | 0.009462         | -2.99   | 13.94          |
| 4     | FOXP1_22492998_ChIP-Seq_STRATIUM_Mouse        | 0.005027    | 0.03393          | -4.06   | 13.72          |
| 5     | ESR1_22446102_ChIP-Seq_UTERI_Mouse            | 0.0002684   | 0.005797         | -2.46   | 12.65          |
| 6     | FOXA2_19822575_ChIP-Seq_HepG2_Human           | 0.000003903 | 0.0002810        | -1.20   | 9.82           |
| 7     | TFEB_21752829_ChIP-Seq_HELA_Human             | 0.0003687   | 0.007099         | -1.92   | 9.50           |
| 8     | BCL11B_21912641_ChIP-Seq_STHDH STRIUM_Mouse   | 0.008180    | 0.04530          | -2.86   | 8.85           |
| 9     | ARNT_22903824_ChIP-Seq_MCF7_Human             | 0.0007447   | 0.009462         | -1.83   | 8.55           |
| 10    | CIITA_18437201_ChIP-ChIP_Raji B and iDC_Human | 0.01114     | 0.05347          | -2.91   | 8.53           |
