# Supplementary material for: Genetic loci associated with coronary artery disease harbor evidence of selection and antagonistic pleiotropy
Source: PubMed Central journal article supplement (PMC5480811; doi:10.1371/journal.pgen.1006328), 2017-06-22
Supplement: pgen.1006328.s006.pdf [file pgen.1006328.s006.pdf]

**Table S3. Testing for antagonistic pleiotropy for SNPs with significant effects on lifetime reproductive success (LRS) and coronary artery disease (CAD).** *Left table:* provides statistics for CAD index SNPs derived directly from the CARDIoGRAMplusC4D 1000 Genomes-based GWAS meta-analysis (see [1] or <http://www.cardiogramplusc4d.org/data-downloads/> for further details of data and variables). *Right table:* provides corresponding FaST-LMM regression statistics of these SNPs on LRS based on Framingham Heart Study women (first six columns), rows correspond to SNPs in the left table. Last four columns test for antagonistic effects between CAD and LRS with the last two providing these tests only when the LRS beta was significant. This shows that when SNPs with significant effects on both LRS and CAD are considered, most (5 of 6, or 83%) were antagonistic, i.e. the allele that increases LRS also increases CAD risk.

| index SNP  | chr | gene       | locus name          | Nikpay Statistics (additive) |               |                   |         |        |          | FaST-LMM results (LRS) |         |        |          |        | Antagonistic effect checks (LRS beta corrected for Nikpay effect allele) |                    |               |              |
|------------|-----|------------|---------------------|------------------------------|---------------|-------------------|---------|--------|----------|------------------------|---------|--------|----------|--------|--------------------------------------------------------------------------|--------------------|---------------|--------------|
|            |     |            |                     | b37 position                 | effect allele | non-effect allele | beta    | se_dgc | p_dgc    | het_pvalue             | beta    | se     | p value  | allele | MAF                                                                      | beta (any p value) | beta (p<0.05) |              |
| rs7212798  | 17  | BCAS3      | BCAS3               | 59013488                     | T             | C                 | -0.0800 | 0.0142 | 1.88E-08 | 2.11E-01               | 0.0035  | 0.0165 | 8.32E-01 | C      | T                                                                        | 0.1355             | -0.0035       | antagonistic |
| rs12413409 | 10  | CNNM2      | CYP17A1-CNNM2-NTSC2 | 104719096                    | G             | A                 | 0.0752  | 0.0141 | 1.07E-07 | 1.13E-01               | -0.0143 | 0.0159 | 3.70E-01 | A      | G                                                                        | 0.0820             | 0.0143        | antagonistic |
| rs2252641  | 2   | TEX41      | ZEB2-AC074093.1     | 145801461                    | C             | T                 | 0.0333  | 0.0096 | 5.16E-04 | 7.11E-02               | 0.0104  | 0.0159 | 5.15E-01 | C      | T                                                                        | 0.4636             | 0.0104        | antagonistic |
| rs216172   | 17  | SMG6       | SMG6                | 2126504                      | G             | C                 | -0.0480 | 0.0096 | 5.07E-07 | 2.00E-01               | 0.0216  | 0.0160 | 1.76E-01 | C      | G                                                                        | 0.3495             | -0.0216       | antagonistic |
| rs12526453 | 6   | PHACTR1    | PHACTR1             | 12927544                     | C             | G                 | 0.0968  | 0.0105 | 2.14E-20 | 4.58E-01               | -0.0073 | 0.0160 | 6.49E-01 | G      | C                                                                        | 0.3245             | 0.0073        | antagonistic |
| rs1122608  | 19  | LDLR       | LDLR                | 11163601                     | G             | T                 | 0.0732  | 0.0110 | 2.73E-11 | 7.48E-02               | 0.0262  | 0.0159 | 1.01E-01 | T      | G                                                                        | 0.2498             | -0.0262       | -            |
| rs10947789 | 6   | KCNK5      | KCNK5               | 39174922                     | T             | C                 | 0.0531  | 0.0111 | 1.63E-06 | 5.55E-01               | 0.0088  | 0.0160 | 5.86E-01 | C      | T                                                                        | 0.2387             | -0.0088       | -            |
| rs579459   | 9   | ABO        | ABO                 | 136154168                    | T             | C                 | -0.0730 | 0.0113 | 1.14E-10 | 2.58E-02               | 0.0117  | 0.0160 | 4.66E-01 | C      | T                                                                        | 0.1889             | -0.0117       | antagonistic |
| rs10840293 | 11  | SWAP70     | SWAP70              | 9751196                      | A             | G                 | 0.0547  | 0.0096 | 1.28E-08 | 1.58E-01               | -0.0039 | 0.0182 | 8.32E-01 | G      | A                                                                        | 0.4218             | 0.0039        | antagonistic |
| rs3184504  | 12  | SH2B3      | SH2B3               | 111884608                    | C             | T                 | -0.0642 | 0.0105 | 1.03E-09 | 6.76E-03               | -0.0056 | 0.0198 | 7.77E-01 | T      | C                                                                        | 0.4839             | 0.0056        | -            |
| rs12936587 | 17  | PEMT       | RAI1-PEMT-RASD1     | 17543722                     | G             | A                 | 0.0333  | 0.0099 | 8.24E-04 | 1.98E-01               | 0.0079  | 0.0176 | 6.52E-01 | A      | G                                                                        | 0.4467             | -0.0079       | -            |
| rs9818870  | 3   | MRAS       | MRAS                | 138122122                    | C             | T                 | -0.0646 | 0.0137 | 2.21E-06 | 4.61E-01               | -0.0013 | 0.0159 | 9.35E-01 | T      | C                                                                        | 0.1403             | 0.0013        | -            |
| rs2505083  | 10  | KIAA1462   | KIAA1462            | 30335122                     | T             | C                 | -0.0610 | 0.0095 | 1.57E-10 | 2.36E-01               | 0.0035  | 0.0181 | 8.46E-01 | C      | T                                                                        | 0.3981             | -0.0035       | antagonistic |
| rs7692387  | 4   | GUCY1A3    | GUCY1A3             | 156635309                    | G             | A                 | 0.0679  | 0.0117 | 7.35E-09 | 7.64E-01               | 0.0155  | 0.0160 | 3.32E-01 | A      | G                                                                        | 0.1805             | -0.0155       | -            |
| rs3217992  | 9   | CDKN2B-AS1 | CDKN2BAS1           | 22003223                     | C             | T                 | -0.1283 | 0.0094 | 1.03E-42 | 3.25E-04               | 0.0173  | 0.0164 | 2.94E-01 | T      | C                                                                        | 0.3939             | -0.0173       | antagonistic |
| rs17609940 | 6   | ANKS1A     | ANKS1A              | 35034800                     | G             | C                 | 0.0276  | 0.0125 | 2.65E-02 | 3.59E-01               | 0.0237  | 0.0160 | 1.40E-01 | C      | G                                                                        | 0.1857             | -0.0237       | -            |
| rs974819   | 11  | PDGFD      | PDGFD               | 103660567                    | C             | T                 | -0.0634 | 0.0100 | 2.44E-10 | 2.17E-01               | 0.0070  | 0.0163 | 6.66E-01 | T      | C                                                                        | 0.3082             | -0.0070       | antagonistic |
| rs11830157 | 12  | KSR2       | KSR2                | 118265441                    | T             | G                 | -0.0347 | 0.0098 | 3.88E-04 | 1.39E-01               | 0.0220  | 0.0184 | 2.32E-01 | G      | T                                                                        | 0.3703             | -0.0220       | antagonistic |
| rs9319428  | 13  | FLT1       | FLT1                | 28973621                     | G             | A                 | -0.0396 | 0.0100 | 7.13E-05 | 3.90E-01               | 0.0415  | 0.0169 | 1.43E-02 | A      | G                                                                        | 0.2877             | -0.0415       | antagonistic |
| rs6544713  | 2   | ABCG5      | ABCG5-ABCG8         | 44073881                     | C             | T                 | -0.0515 | 0.0105 | 8.88E-07 | 5.40E-02               | 0.0161  | 0.0163 | 3.23E-01 | T      | C                                                                        | 0.3303             | -0.0161       | antagonistic |
| rs11556924 | 7   | ZC3HC1     | ZC3HC1              | 129663496                    | C             | T                 | 0.0726  | 0.0111 | 5.34E-11 | 8.44E-02               | 0.0057  | 0.0160 | 7.21E-01 | T      | C                                                                        | 0.3797             | -0.0057       | -            |
| rs56062135 | 15  | SMAD3      | SMAD3               | 67455630                     | C             | T                 | 0.0697  | 0.0119 | 4.52E-09 | 6.68E-01               | -0.0109 | 0.0171 | 5.24E-01 | T      | C                                                                        | 0.2080             | 0.0109        | antagonistic |
| rs17087335 | 4   | REST       | REST-NOA1           | 57838583                     | G             | T                 | -0.0608 | 0.0111 | 4.59E-08 | 1.14E-01               | -0.0140 | 0.0159 | 3.79E-01 | T      | G                                                                        | 0.1811             | 0.0140        | -            |
| rs17114036 | 1   | PPAP2B     | PPAP2B              | 56962821                     | A             | G                 | 0.1231  | 0.0168 | 2.22E-13 | 6.45E-02               | 0.0199  | 0.0161 | 2.17E-01 | G      | A                                                                        | 0.0940             | -0.0199       | -            |
| rs17464857 | 1   | MIA3       | MIA3                | 222762709                    | T             | G                 | 0.0573  | 0.0140 | 4.18E-05 | 4.71E-01               | 0.0142  | 0.0159 | 3.69E-01 | G      | T                                                                        | 0.1457             | -0.0142       | -            |
| rs4845625  | 1   | IL6R       | IL6R                | 154422067                    | C             | T                 | -0.0507 | 0.0092 | 3.93E-08 | 6.40E-01               | 0.0018  | 0.0161 | 9.09E-01 | T      | C                                                                        | 0.4178             | -0.0018       | antagonistic |
| rs2023938  | 7   | HDAC9      | HDAC9               | 19036775                     | T             | C                 | -0.0591 | 0.0155 | 1.36E-04 | 2.97E-01               | 0.0436  | 0.0159 | 6.24E-03 | C      | T                                                                        | 0.0892             | 0.0436        | -            |
| rs9515203  | 13  | COL4A1     | COL4A1-COL4A2       | 111049623                    | T             | C                 | 0.0711  | 0.0116 | 9.33E-10 | 1.39E-01               | 0.0176  | 0.0184 | 3.39E-01 | C      | T                                                                        | 0.1985             | -0.0176       | -            |
| rs8042271  | 15  | ABHD2      | MFG8-ABHD2          | 89574218                     | A             | G                 | -0.0967 | 0.0176 | 3.68E-08 | 1.86E-01               | -0.0264 | 0.0162 | 1.03E-01 | A      | G                                                                        | 0.0470             | -0.0264       | antagonistic |
| rs602633   | 1   | SORT1      | SORT1               | 109821511                    | G             | T                 | 0.0960  | 0.0115 | 6.97E-17 | 7.33E-03               | -0.0073 | 0.0163 | 6.53E-01 | T      | G                                                                        | 0.2171             | 0.0073        | antagonistic |
| rs264      | 8   | LPL        | LPL                 | 19813180                     | G             | A                 | 0.0583  | 0.0132 | 1.06E-05 | 9.78E-01               | 0.0188  | 0.0160 | 2.40E-01 | A      | G                                                                        | 0.1355             | -0.0188       | -            |
| rs7173743  | 15  | ADAMT57    | ADAMT57             | 79141784                     | T             | C                 | 0.0755  | 0.0093 | 5.55E-16 | 2.12E-01               | 0.0188  | 0.0163 | 2.48E-01 | C      | T                                                                        | 0.4627             | -0.0188       | -            |
| rs46522    | 17  | UBE2Z      | UBE2Z               | 46988597                     | C             | T                 | -0.0398 | 0.0093 | 1.84E-05 | 6.44E-01               | 0.0028  | 0.0159 | 8.60E-01 | C      | T                                                                        | 0.4658             | 0.0028        | -            |
| rs273909   | 5   | SLC22A4    | SLC22A4-SLC22A5     | 131667353                    | A             | G                 | -0.0559 | 0.0146 | 1.24E-04 | 4.79E-01               | -0.0027 | 0.0166 | 8.69E-01 | G      | A                                                                        | 0.0726             | -0.0027       | antagonistic |
| rs12976411 | 19  | LOC400684  | ZNF507-LOC400684    | 32882020                     | A             | T                 | 0.0478  | 0.0183 | 9.12E-03 | 1.03E-01               | 0.0010  | 0.0164 | 9.50E-01 | T      | A                                                                        | 0.0385             | 0.0010        | antagonistic |
| rs2047009  | 10  | CXCL12     | CXCL12              | 44539913                     | T             | G                 | -0.0613 | 0.0092 | 2.75E-11 | 1.54E-01               | 0.0041  | 0.0159 | 7.97E-01 | T      | G                                                                        | 0.4769             | 0.0041        | -            |
| rs515135   | 2   | APOB       | APOB                | 21286057                     | C             | T                 | 0.0675  | 0.0122 | 3.09E-08 | 9.42E-01               | 0.0159  | 0.0160 | 3.23E-01 | T      | C                                                                        | 0.1979             | -0.0159       | -            |
| rs1878406  | 4   | EDNRA      | EDNRA               | 148393664                    | C             | T                 | -0.0604 | 0.0125 | 1.24E-06 | 3.59E-02               | -0.0137 | 0.0160 | 3.93E-01 | T      | C                                                                        | 0.1399             | 0.0137        | -            |
| rs4252120  | 6   | PLG        | PLG                 | 161143608                    | T             | C                 | 0.0329  | 0.0112 | 3.32E-03 | 8.71E-01               | -0.0468 | 0.0159 | 3.32E-03 | C      | T                                                                        | 0.2967             | 0.0468        | antagonistic |
| rs11206510 | 1   | PCSK9      | PCSK9               | 55496039                     | T             | C                 | 0.0745  | 0.0133 | 2.34E-08 | 5.58E-01               | -0.0012 | 0.0159 | 9.39E-01 | C      | T                                                                        | 0.1932             | 0.0012        | antagonistic |
| rs17514846 | 15  | FES        | FURIN-FES           | 91416550                     | C             | A                 | -0.0509 | 0.0100 | 3.10E-07 | 2.42E-01               | -0.0372 | 0.0344 | 2.79E-01 | A      | C                                                                        | 0.4834             | 0.0372        | -            |
| rs6725887  | 2   | WDR12      | WDR12               | 203745885                    | T             | C                 | -0.1329 | 0.0155 | 9.51E-18 | 3.93E-01               | -0.0214 | 0.0159 | 1.78E-01 | C      | T                                                                        | 0.1308             | 0.0214        | -            |
| rs1561198  | 2   | VAMP5      | VAMP5-VAMP8-GGCX    | 85809989                     | C             | T                 | -0.0584 | 0.0095 | 6.37E-10 | 4.03E-01               | 0.0216  | 0.0161 | 1.79E-01 | T      | C                                                                        | 0.4663             | -0.0216       | antagonistic |
| rs2954029  | 8   | TRIB1      | TRIB1               | 126490972                    | A             | T                 | 0.0439  | 0.0093 | 2.61E-06 | 2.42E-01               | 0.0169  | 0.0162 | 2.96E-01 | T      | A                                                                        | 0.4396             | -0.0169       | -            |
| rs12190287 | 6   | TCF21      | TCF21               | 134214525                    | C             | G                 | 0.0580  | 0.0177 | 1.07E-03 | 1.24E-09               | -0.0435 | 0.0176 | 1.33E-02 | G      | C                                                                        | 0.3670             | 0.0435        | antagonistic |
| rs180803   | 22  | POM121L9P  | POM121L9P-ADORA2A   | 24658858                     | T             | G                 | -0.1809 | 0.0283 | 1.64E-10 | 6.68E-01               | -       | -      | -        | -      | 0.0092                                                                   | -                  | -             |              |
| rs663129   | 18  | PMAIP1     | PMAIP1-MC4R         | 57838401                     | G             | A                 | -0.0582 | 0.0105 | 3.20E-08 | 5.95E-01               | 0.0106  | 0.0160 | 5.06E-01 | A      | G                                                                        | 0.2172             | -0.0106       | antagonistic |
| rs3918226  | 7   | NOS3       | NOS3                | 150690176                    | C             | T                 | -0.1333 | 0.0221 | 1.69E-09 | 1.94E-01               | 0.0364  | 0.0175 | 3.84E-02 | T      | C                                                                        | 0.0278             | -0.0364       | antagonistic |
| rs2048327  | 6   | LPA        | SLC22A3-LPAL2-LPA   | 160863532                    | T             | C                 | -0.0575 | 0.0096 | 2.46E-09 | 8.72E-03               | -0.0418 | 0.0160 | 8.94E-03 | C      | T                                                                        | 0.3648             | -0.0418       | antagonistic |
| rs11203042 | 10  | LIPA       | LIPA                | 90989109                     | C             | T                 | -0.0355 | 0.0092 | 1.22E-04 | 3.10E-01               | 0.0238  | 0.0165 | 1.50E-01 | T      | C                                                                        | 0.4519             | 0.0238        | -            |
| rs9982601  | 21  | KCNE2      | KCNE2               | 35599128                     | C             | T                 | -0.1098 | 0.0148 | 1.33E-13 | 5.43E-02               | -0.0084 | 0.0161 | 6.02E-01 | T      | C                                                                        | 0.1369             | 0.0084        | -            |
| rs2895811  | 14  | HHLPL1     | HHLPL1              | 100133942                    | T             | C                 | -0.0408 | 0.0095 | 1.86E-05 | 3.75E-02               | -0.0209 | 0.0202 | 3.01E-01 | C      | T                                                                        | 0.3636             | 0.0209        | -            |
| rs445925   | 19  | APOC1      | ApoE-ApoC1          | 45415640                     | G             | A                 | 0.0858  | 0.0187 | 4.23E-06 | 5.30E-02               | 0.0169  | 0.0204 | 4.09E-01 | A      | G                                                                        | 0.0356             | -0.0169       | -            |
| rs9326246  | 11  | APOA1      | ZNF259-APOA5-APOA1  | 116611733                    | G             | C                 | -0.0458 | 0.0151 | 2.46E-03 | 2.56E-02               | -0.0253 | 0.0159 | 1.12E-01 | C      | G                                                                        | 0.0739             | 0.0253        | -            |

5 of 6 (83%) antagonistic

**References**  
 1. Nikpay, M., et al., *A comprehensive 1000 Genomes-based genome-wide association meta-analysis of coronary artery disease.* Nature Genetics, 2015. **47**(10): p. 1121-+.
