# Supplementary material for: Genetic loci associated with coronary artery disease harbor evidence of selection and antagonistic pleiotropy
Source: PubMed Central journal article supplement (PMC5480811; doi:10.1371/journal.pgen.1006328), 2017-06-22
Supplement: pgen.1006328.s007.pdf [file pgen.1006328.s007.pdf]

**Table S4. Pleiotropic links between coronary artery disease (CAD) and early-life fitness-related traits due to shared genetic loci.** The table below provides extensive support (143 studies) that antagonistic pleiotropy is likely to be present for CAD genes due to their consistent connections with fitness-related traits expressed early in life. See Fig. 5 for discussion and conceptual overview of these potential effects. Fitness-related traits include fertility potential, reproductive outcomes, pregnancy outcomes, fetal growth and survival, i.e. affecting the ability of an organism to reproduce and transfer genes to the next generation. The first 3 columns give CAD gene rank (no.; based on rank of 40 genes from Fig. 1B), name and full name. Columns 4-8 provide key details of each study where CAD genes also contribute to traits that influence fitness, including what species that was demonstrated in, what biological process or fitness effects that gene is impacting, what fitness class that effect is likely to impact (e.g. dysfunctional spermatogenesis or embryogenesis will affect male and female fertility, ability to conceive), what the observed genetic effect or mechanism that gene was associated with.

| no. | CAD gene       | full name                                                        | species         | fitness effects                      | fitness class*             | observed genetic effect or mechanism                                                 | ref  |
|-----|----------------|------------------------------------------------------------------|-----------------|--------------------------------------|----------------------------|--------------------------------------------------------------------------------------|------|
| 1   | <i>BCAS3</i>   | Breast Carcinoma Amplified Sequence 3                            | human/<br>mouse | embryogenesis                        | female potential fertility | <i>BCAS3</i> highly expressed in developing oocytes                                  | [1]  |
|     | <i>BCAS3</i>   |                                                                  | mouse           | embryogenesis                        | female potential fertility | <i>BCAS3</i> significantly up-regulated in developmentally incompetent mouse oocytes | [2]  |
| 2   | <i>CNNM2</i>   | Cyclin And CBS Domain Divalent Metal Cation Transport Mediator 2 | human           | pregnancy-related blood pressure     | pregnancy outcomes         | <i>CNNM2</i> significantly differentially expressed                                  | [3]  |
|     | <i>CNNM2</i>   |                                                                  | mouse           | pregnancy complications, hypoxia     | pregnancy outcomes         | <i>CNNM2</i> significantly down-regulated (-2.5 fold change) during pregnancy        | [4]  |
| 3   | <i>TEX41</i>   | Testis Expressed 41 (Non- Protein Coding)                        | human           | fetal IUGR, developmental delays     | pregnancy outcomes         | triplication involving <i>TEX41</i> causes IUGR                                      | [5]  |
| 4   | <i>SMG6</i>    | Nonsense Mediated MRNA Decay Factor                              | mouse           | altered embryogenesis                | female potential fertility | <i>SMG6</i> essential for normal embryogenesis based on gene knock-down study        | [6]  |
| 5   | <i>PHACTR1</i> | Phosphatase And Actin Regulator 1                                | human           | reproductive timing                  | reproductive outcomes      | <i>PHACTR1</i> genetic variation                                                     | [7]  |
|     | <i>PHACTR1</i> |                                                                  | human           | oocyte function                      | female potential fertility | <i>PHACTR1</i> highly significantly expressed                                        | [8]  |
|     | <i>PHACTR1</i> |                                                                  | human           | placental inflammatory responses     | pregnancy outcomes         | <i>PHACTR1</i> significantly down-regulated                                          | [9]  |
|     | <i>PHACTR1</i> |                                                                  | human           | endometrium implantation receptivity | female potential fertility | <i>PHACTR1</i> 8-fold significantly up-regulated                                     | [10] |
|     | <i>PHACTR1</i> |                                                                  | mouse           | uterus functioning                   | female potential fertility | <i>PHACTR1</i> significant 1.4-1.9 fold change                                       | [11] |
|     | <i>PHACTR1</i> |                                                                  | rat             | lactation                            | reproductive outcomes      | <i>PHACTR1</i> significantly expressed (4.7 fold change) in mammary tissues          | [12] |

Table S4

|    |              |                                                          |                   |                                                                                                                |                            |                                                                                                                                              |      |
|----|--------------|----------------------------------------------------------|-------------------|----------------------------------------------------------------------------------------------------------------|----------------------------|----------------------------------------------------------------------------------------------------------------------------------------------|------|
| 6  | <b>COG5</b>  | Component of Oligomeric Golgi Complex 5                  | <i>Drosophila</i> | spermatogenesis                                                                                                | male potential fertility   | <i>COG5</i> expression required for normal spermatogenesis                                                                                   | [13] |
|    | <b>COG5</b>  |                                                          | human             | intrauterine growth                                                                                            | pregnancy outcomes         | <i>COG5</i> expression required for normal fetal growth                                                                                      | [14] |
| 7  | <b>ABCG8</b> | ATP-Binding Cassette, Sub-Family G, Member 8             | mouse             | infertility                                                                                                    | female potential fertility | Knockout mice deficient <i>Abcg8</i> are infertile                                                                                           | [15] |
|    | <b>ABCG8</b> |                                                          | human             | fetal distress, asphyxial events, intrauterine death                                                           | pregnancy outcomes         | <i>ABCG8</i> involved in intrahepatic cholestasis of pregnancy (ICP), enterohepatic circulation, specifically for exportation of cholesterol | [16] |
| 8  | <b>RAI1</b>  | Retinoic Acid Induced 1                                  | human/<br>mouse   | growth retardation, embryonic-postnatal development                                                            | pregnancy outcomes         | knock-out mouse model for Smith-Magenis syndrome shows involvement of <i>RAI1</i>                                                            | [17] |
|    | <b>RAI1</b>  |                                                          | mouse             | growth retardation, impaired motor and sensory coordination, smaller litter size (direct reproductive fitness) | pregnancy outcomes         | Transgenic mice over-expressing <i>RAI1</i> have developmentally impaired offspring                                                          | [18] |
| 9  | <b>NT5C2</b> | Nucleotidase, Cytosolic II                               | human             | female reproduction                                                                                            | female potential fertility | <i>NT5C2</i> is over-expressed in fallopian tube, uterine endometrium, endocervix, ectocervix                                                | [19] |
|    | <b>NT5C2</b> |                                                          | human             | fetal growth, birthweight, postnatal growth & metabolism                                                       | pregnancy outcomes         | <i>NT5C2</i> genetic variation affects birthweight                                                                                           | [20] |
| 10 | <b>LDLR</b>  | Low Density Lipoprotein Receptor                         | human/<br>mouse   | IUGR in offspring of <i>LDLR</i> <sup>-/-</sup> mice. Childhood obesity.                                       | pregnancy outcomes         | <i>LDLR</i> involved in fetal/offspring growth                                                                                               | [21] |
|    | <b>LDLR</b>  |                                                          | human             | Placental regulation of cholesterol                                                                            | pregnancy outcomes         | Maternal lipid profile affecting placental protein expression of <i>LDLR</i>                                                                 | [22] |
|    | <b>LDLR</b>  |                                                          | mouse             | Placental regulation of cholesterol                                                                            | pregnancy outcomes         | <i>LDLR</i> involved in maternal-fetal transfer of lipids                                                                                    | [23] |
|    | <b>LDLR</b>  |                                                          | rat               | Pregnancy loss                                                                                                 | fetal/offspring mortality  | <i>LDLR</i> rat model for diabetes                                                                                                           | [24] |
| 11 | <b>KCNK5</b> | Potassium Channel, Two Pore Domain Subfamily K, Member 5 | human             | Fertility - sperm volume                                                                                       | male potential fertility   | <i>KCNK5</i> involved in protein and mRNA levels in sperm                                                                                    | [25] |
|    | <b>KCNK5</b> |                                                          | human             | Male infertility                                                                                               | male potential fertility   | <i>KCNK5</i> involvement in sperm inability to fertilize egg                                                                                 | [26] |
|    | <b>KCNK5</b> |                                                          | mouse             | Male infertility                                                                                               | male potential fertility   | <i>KCNK5</i> involved in sperm volume                                                                                                        | [27] |
|    | <b>KCNK5</b> |                                                          | primate           | Male fertility                                                                                                 | male potential fertility   | <i>KCNK5</i> involved in sperm function                                                                                                      | [28] |
|    | <b>KCNK5</b> |                                                          | mouse             | Female fertility                                                                                               | female potential fertility | <i>KCNK5</i> involved in oocyte survival/viability                                                                                           | [29] |
|    | <b>KCNK5</b> |                                                          | cattle            | Lactation                                                                                                      | reproductive               | <i>KCNK5</i> expression                                                                                                                      | [30] |

Table S4

|    |               |                                                                                                                              |        |                                                                                         |                            |                                                                 |      |
|----|---------------|------------------------------------------------------------------------------------------------------------------------------|--------|-----------------------------------------------------------------------------------------|----------------------------|-----------------------------------------------------------------|------|
| 12 | <b>ABO</b>    | ABO Blood Group (Transferase A, Alpha 1-3-N-Acetylgalactosaminyltransferase; Transferase B, Alpha 1-3-Galactosyltransferase) | human  | Birth weight, maternal age at child-bearing                                             | pregnancy outcomes         | outcomes<br><i>ABO</i> variation effects                        | [31] |
|    | <b>ABO</b>    |                                                                                                                              | human  | Fetal growth restriction                                                                | pregnancy outcomes         | <i>ABO</i> variation effects                                    | [32] |
|    | <b>ABO</b>    |                                                                                                                              | human  | fetal hypoxia, pregnancy complications, hemolytic disease of fetus/newborn, fetal death | pregnancy outcomes         | <i>ABO</i> incompatibility effects                              | [33] |
|    | <b>ABO</b>    |                                                                                                                              | human  | protection against malaria                                                              | pregnancy outcomes         | <i>ABO</i> variation effects                                    | [34] |
|    | <b>ABO</b>    |                                                                                                                              | human  | Age at menarche                                                                         | reproductive outcomes      | <i>ABO</i> blood group phenotypes                               | [35] |
|    | <b>ABO</b>    |                                                                                                                              | human  | male infertility                                                                        | male potential fertility   | <i>ABO</i> involved in sperm concentration/function             | [36] |
|    | <b>ABO</b>    |                                                                                                                              | human  | pregnancy complications                                                                 | pregnancy outcomes         | <i>ABO</i> involved in preeclampsia                             | [37] |
|    | <b>ABO</b>    |                                                                                                                              | human  | female fertility, embryo implantation                                                   | female potential fertility | <i>ABO</i> variation effects                                    | [38] |
| 13 | <b>SWAP70</b> | SWAP Switching B-Cell Complex 70kDa Subunit                                                                                  | monkey | female fertility, implantation, placentation                                            | female potential fertility | <i>SWAP-70</i> expression effects                               | [39] |
|    | <b>SWAP70</b> |                                                                                                                              | human  | fetal growth restriction                                                                | pregnancy outcomes         | <i>SWAP70</i> involved in preeclampsia                          | [40] |
| 14 | <b>SH2B3</b>  | SH2B Adaptor Protein 3                                                                                                       | human  | intrauterine/postnatal growth                                                           | pregnancy outcomes         | <i>SH2B3</i> variation effects                                  | [41] |
|    | <b>SH2B3</b>  |                                                                                                                              | human  | male testicular function                                                                | male potential fertility   | <i>SH2B3</i> variation effects                                  | [42] |
| 15 | <b>PEMT</b>   | Phosphatidylethanolamine N-Methyltransferase                                                                                 | human  | fetal growth, placental function                                                        | pregnancy outcomes         | Choline metabolism/ <i>PEMT</i> expression effects              | [43] |
|    | <b>PEMT</b>   |                                                                                                                              | human  | premature birth                                                                         | pregnancy outcomes         | <i>PEMT</i> variation [744CC genotype] effects                  | [44] |
|    | <b>PEMT</b>   |                                                                                                                              | human  | sperm quality                                                                           | male potential fertility   | <i>PEMT</i> variation [27774G.C] effects                        | [45] |
|    | <b>PEMT</b>   |                                                                                                                              | human  | fetal growth, placental function                                                        | pregnancy outcomes         | mRNA levels of <i>PEMT</i> involved in fetal/placental function | [46] |
|    | <b>PEMT</b>   |                                                                                                                              | mouse  | embryo survival/viability during pre-implantation                                       | female potential fertility | <i>PEMT</i> expression effects                                  | [47] |
|    | <b>PEMT</b>   |                                                                                                                              | human  | fetal development                                                                       | pregnancy outcomes         | <i>PEMT</i> expression effects                                  | [48] |
| 16 | <b>MRAS</b>   | Muscle RAS Oncogene Homolog                                                                                                  | mouse  | male testicular function                                                                | male potential fertility   | <i>MRAS</i> expression effects                                  | [49] |
|    | <b>MRAS</b>   |                                                                                                                              |        | embryo implantation                                                                     | female potential           | <i>MRAS</i> regulation by androgen                              | [50] |

Table S4

|    |                   |                                                             |                 |                                                          |                                      |                                                                       |      |
|----|-------------------|-------------------------------------------------------------|-----------------|----------------------------------------------------------|--------------------------------------|-----------------------------------------------------------------------|------|
|    |                   |                                                             |                 | embryo pluripotency                                      | fertility and progesterone receptors |                                                                       |      |
|    | <b>MRAS</b>       |                                                             | mouse           | embryo pluripotency                                      | female potential fertility           | <i>MRAS</i> expression effects                                        | [51] |
|    | <b>MRAS</b>       | Muscle RAS Oncogene Homolog                                 | human           | breastfeeding capacity                                   | reproductive outcomes                | <i>MRAS</i> expression effects                                        | [52] |
| 17 | <b>KIAA1462</b>   | <i>KIAA1462</i>                                             | bird            | offspring number                                         | reproductive outcomes                | <i>KIAA1462</i> expression effects                                    | [53] |
|    | <b>KIAA1462</b>   |                                                             | human           | birth-related myometrial gene expression                 | pregnancy outcomes                   | <i>KIAA1462</i> expression effects                                    | [54] |
|    | <b>KIAA1462</b>   |                                                             | mouse           | female reproduction                                      | female potential fertility           | <i>KIAA1462</i> highly expressed in oocytes & ovaries                 | [55] |
|    | <b>KIAA1462</b>   |                                                             | pig             | fetal growth                                             | pregnancy outcomes                   | <i>KIAA1462</i> expression effects                                    | [56] |
|    | <b>KIAA1462</b>   |                                                             | human           | embryo implantation                                      | female potential fertility           | <i>KIAA1462</i> significantly differentially expression               | [57] |
| 18 | <b>GUCY1A3</b>    | Guanylate Cyclase 1, Soluble, Alpha 3                       | cattle          | embryo implantation                                      | female potential fertility           | <i>GUCY1A3</i> expression effects                                     | [58] |
|    | <b>GUCY1A3</b>    |                                                             |                 | embryo implantation                                      | female potential fertility           | <i>GUCY1A3</i> expression effects                                     | [59] |
|    | <b>GUCY1A3</b>    |                                                             | human           | placental functioning                                    | pregnancy outcomes                   | <i>GUCY1A3</i> expression effects                                     | [60] |
|    | <b>GUCY1A3</b>    |                                                             | human           | birth weight                                             | pregnancy outcomes                   | <i>GUCY1A3</i> expression effects                                     | [61] |
|    | <b>GUCY1A3</b>    |                                                             | human           | fetal growth, birthweight, postnatal growth & metabolism | pregnancy outcomes                   | <i>GUCY1A3</i> fetal genotype involved in fetal development           | [62] |
| 19 | <b>CDKN2B-AS1</b> | CDKN2B Antisense RNA 1                                      | human           | fertility                                                | female potential fertility           | <i>CDKN2B-AS1</i> linked endometriosis                                | [63] |
|    | <b>CDKN2B-AS1</b> |                                                             | human           | fetal growth restriction                                 | pregnancy outcomes                   | <i>CDKN2B-AS1</i> variation                                           | [64] |
| 20 | <b>ANKS1A</b>     | Ankyrin Repeat And Sterile Alpha Motif Domain Containing 1A | cattle          | fertility                                                | female potential fertility           | <i>ANKS1A</i> significant expression in endometrium and corpus luteum | [65] |
|    | <b>ANKS1A</b>     |                                                             | cattle          | fertility                                                | female potential fertility           | <i>ANKS1A</i> 6.7-fold significantly up-regulated in blastocysts      | [66] |
|    | <b>ANKS1A</b>     |                                                             | human/<br>mouse | male fertility                                           | male potential fertility             | <i>ANKS1A</i> expression                                              | [67] |
| 21 | <b>PDGFD</b>      | Platelet Derived Growth Factor D                            | human           | female fertility                                         | female potential fertility           | <i>PDGFD</i> involved in ovarian hyperstimulation                     | [68] |
|    | <b>PDGFD</b>      |                                                             | human           | female reproduction                                      | female potential fertility           | <i>PDGFD</i> significantly expressed in oocytes                       | [69] |
|    | <b>PDGFD</b>      |                                                             | mouse           | male/female reproduction                                 | female potential fertility           | <i>PDGFD</i> significantly expressed                                  | [70] |
|    | <b>PDGFD</b>      |                                                             |                 | female reproductive function                             | female potential fertility           | <i>PDGFD</i> significantly down-regulated in endometrium              | [71] |
|    | <b>PDGFD</b>      |                                                             | rat             | female reproductive function                             | female potential fertility           | <i>PDGFD</i> significantly expressed                                  | [72] |
|    | <b>PDGFD</b>      |                                                             | human           | pregnancy complication, preeclampsia                     | pregnancy outcomes                   | <i>PDGFD</i> significantly down-regulated in placenta                 | [73] |
| 22 | <b>KSR2</b>       | Kinase Suppressor Of Ras 2                                  | mouse           | male fertility                                           | male potential fertility             | <i>KSR2</i> -/- knockout mouse model for spermatogenesis              | [74] |
|    | <b>KSR2</b>       |                                                             | cattle          | female reproductive                                      | female potential fertility           | <i>KSR2</i> significantly up-                                         | [75] |

Table S4

|    |               |                                              |                                                          |                                 |                                                                                                    |                                      |
|----|---------------|----------------------------------------------|----------------------------------------------------------|---------------------------------|----------------------------------------------------------------------------------------------------|--------------------------------------|
|    |               |                                              | function                                                 | fertility                       | regulated in epithelial cells                                                                      |                                      |
|    | <b>KSR2</b>   | mouse                                        | offspring growth                                         | fetal/offspring mortality       | <i>KSR2</i> -/- knockout mouse model                                                               | [76]                                 |
| 23 | <b>FLT1</b>   | Fms-Related Tyrosine Kinase 1                | human                                                    | fetal development               | pregnancy outcomes                                                                                 | <i>FLT1</i> expression effects [77]  |
|    | <b>FLT1</b>   | mouse                                        | offspring viability, fetal growth                        | pregnancy outcomes              | <i>FLT1</i> knockdown effects                                                                      | [78]                                 |
|    | <b>FLT1</b>   | human                                        | pregnancy loss                                           | fetal/offspring mortality       | <i>FLT1</i> involved in immune responses to placental malaria                                      | [79]                                 |
|    | <b>FLT1</b>   |                                              | female reproduction                                      | female potential fertility      | <i>FLT1</i> significantly expression in oocytes                                                    | [80]                                 |
|    | <b>FLT1</b>   | human                                        | intrauterine growth restriction                          | pregnancy outcomes              | <i>FLT1</i> significantly up-regulated                                                             | [81]                                 |
|    | <b>FLT1</b>   | human                                        | fetal growth                                             | pregnancy outcomes              | <i>FLT1</i> significantly expressed in placenta                                                    | [82]                                 |
|    | <b>FLT1</b>   | human                                        | female reproduction                                      | female potential fertility      | <i>FLT1</i> significantly expressed in oocytes                                                     | [83]                                 |
|    | <b>FLT1</b>   | human                                        | female reproduction, implantation                        | female potential fertility      | <i>FLT1</i> significantly expressed in uterus                                                      | [84]                                 |
|    | <b>FLT1</b>   | human                                        | female reproduction                                      | pregnancy outcomes              | <i>FLT1</i> significantly expressed in placenta, fetal tissues                                     | [85]                                 |
|    | <b>FLT1</b>   | human                                        | intrauterine growth restriction                          | pregnancy outcomes              | <i>FLT1</i> significantly expressed during pregnancy                                               | [86]                                 |
| 24 | <b>ABCG5</b>  | ATP-Binding Cassette, Sub-Family G, Member 5 | rat                                                      | intrauterine growth restriction | pregnancy outcomes                                                                                 | rat model of IUGR [87]               |
|    | <b>ABCG5</b>  |                                              | trophoblast, blastocyst development                      | female potential fertility      | <i>ABCG5</i> gene expression effects                                                               | [88]                                 |
| 25 | <b>ZC3HC1</b> | Zinc Finger, C3HC-Type Containing 1          |                                                          | male fertility                  | male potential fertility                                                                           | meiosis disruptors [89]              |
|    | <b>ZC3HC1</b> | mouse                                        | pregnancy establishment, maintenance, conceptus survival | female potential fertility      | <i>ZC3HC1</i> expression, 1.57-fold significantly changed                                          | [90]                                 |
| 26 | <b>SMAD3</b>  | SMAD Family Member 3                         |                                                          | folliculogenesis                | female potential fertility                                                                         | <i>SMAD3</i> expression effects [91] |
|    | <b>SMAD3</b>  | mouse/rat                                    | oocyte function                                          | female potential fertility      | <i>SMAD3</i> expression effects                                                                    | [92]                                 |
|    | <b>SMAD3</b>  |                                              | estrogen receptor interactions                           | female potential fertility      | <i>SMAD3</i> expression effects                                                                    | [93]                                 |
|    | <b>SMAD3</b>  | rat                                          | testis function                                          | male potential fertility        | <i>SMAD3</i> expression effects                                                                    | [94]                                 |
|    | <b>SMAD3</b>  | human                                        | age at natural menopause                                 | reproductive outcomes           | <i>SMAD3</i> interaction effects                                                                   | [95]                                 |
|    | <b>SMAD3</b>  | human                                        | twinning capacity                                        | reproductive outcomes           | <i>SMAD3</i> genotype (rs17293443-C) effects                                                       | [96]                                 |
|    | <b>SMAD3</b>  | human                                        | female fertility and fecundity                           | female potential fertility      | <i>SMAD3</i> promotes proliferation and steroidogenesis of human ovarian lutenized granulosa cells | [97]                                 |
|    | <b>SMAD3</b>  | mouse                                        | embryo viability                                         | female potential fertility      | <i>SMAD3</i> signalling effects                                                                    | [98]                                 |

Table S4

|    |                |                                                                         |                  |                                                                   |                               |                                                                                                           |       |
|----|----------------|-------------------------------------------------------------------------|------------------|-------------------------------------------------------------------|-------------------------------|-----------------------------------------------------------------------------------------------------------|-------|
|    | <b>SMAD3</b>   |                                                                         | human            | spermatogenesis,<br>male reproduction                             | male potential<br>fertility   | <i>SMAD3</i> expression effects                                                                           | [99]  |
| 27 | <b>SLC22A3</b> | Solute carrier family<br>22, extra neuronal<br>monoamine<br>transporter | human            | placental functioning                                             | pregnancy<br>outcomes         | <i>SLC22A3</i> expression effects                                                                         | [100] |
|    | <b>SLC22A3</b> |                                                                         | human            | fetal development,<br>fetal-placental<br>resource<br>provisioning | pregnancy<br>outcomes         | <i>SLC22A3</i> expression effects                                                                         | [101] |
|    | <b>SLC22A3</b> |                                                                         | human            | fetal-placental<br>functioning                                    | pregnancy<br>outcomes         | <i>SLC22A3</i> expression changes<br>during pregnancy                                                     | [102] |
|    | <b>SLC22A3</b> |                                                                         | human            | fetal-placental<br>functioning                                    | pregnancy<br>outcomes         | <i>SLC22A3</i> significantly<br>expressed by trimester                                                    | [102] |
| 28 | <b>REST</b>    | RE1-Silencing<br>Transcription Factor                                   | mouse            | embryo functioning                                                | female potential<br>fertility | <i>REST</i> regulatory network<br>effects                                                                 | [103] |
| 29 | <b>PPAP2B</b>  | Phospholipid<br>Phosphatase 3                                           | human            | endometriosis,<br>female fertility                                | female potential<br>fertility | <i>PPAP2B</i> -1.69-fold<br>significantly changed                                                         | [104] |
|    | <b>PPAP2B</b>  |                                                                         | human/r<br>odent | gametogenesis                                                     | male potential<br>fertility   | <i>PPAP2B</i> expression effects                                                                          | [105] |
|    | <b>PPAP2B</b>  |                                                                         | sheep            | breeding capacity                                                 | reproductive<br>outcomes      | <i>PPAP2B</i> association effects                                                                         | [106] |
|    | <b>PPAP2B</b>  |                                                                         | human            | pregnancy<br>complications                                        | pregnancy<br>outcomes         | <i>PPAP2B</i> 1.36 -fold<br>significantly up-regulated in<br>placental tissues of<br>preeclamptic mothers | [107] |
|    | <b>PPAP2B</b>  |                                                                         | human            | embryo viability                                                  | female potential<br>fertility | <i>PPAP2B</i> involved in<br>spontaneous abortion due to<br>parthenogenesis                               | [108] |
|    | <b>PPAP2B</b>  |                                                                         | human            | embryo implantation                                               | female potential<br>fertility | <i>PPAP2B</i> differential<br>expression effects                                                          | [57]  |
|    | <b>PPAP2B</b>  |                                                                         |                  | female reproductive<br>function                                   | female potential<br>fertility | <i>PPAP2B</i> up-regulated in<br>endometrium                                                              | [71]  |
| 30 | <b>MIA3</b>    | Melanoma Inhibitory<br>Activity Family,<br>Member 3                     | cattle           | ovarian functioning                                               | female potential<br>fertility | <i>MIA3</i> 4.6-fold significantly<br>up-regulated                                                        | [109] |
|    | <b>MIA3</b>    |                                                                         | mouse            | placental<br>(dys)function                                        | female potential<br>fertility | <i>MIA3</i> expressed in early<br>trophoblast differentiation                                             | [110] |
| 31 | <b>IL6R</b>    | Interleukin 6 Receptor                                                  | pig              | endometrium<br>functioning                                        | pregnancy<br>outcomes         | <i>IL6R</i> significantly<br>differentially expressed in<br>endometrium                                   | [111] |
|    | <b>IL6R</b>    |                                                                         | cattle           | endometrium<br>functioning                                        | pregnancy<br>outcomes         | <i>IL6R</i> 3.38-fold significantly<br>up-regulated during<br>pregnancy                                   | [112] |
|    | <b>IL6R</b>    |                                                                         | human            | endometrium<br>functioning in PCOS<br>women                       | female potential<br>fertility | <i>IL6R</i> significantly up-<br>regulated                                                                | [113] |
|    | <b>IL6R</b>    |                                                                         | human            | pre-term birth SNP<br>variation                                   | pregnancy<br>outcomes         | <i>IL6R</i> significantly associated<br>with pre-term birth                                               | [114] |
| 32 | <b>HDAC9</b>   | Histone Deacetylase 9                                                   | human            | oocyte function                                                   | female potential<br>fertility | <i>HDAC9</i> expression effects                                                                           | [115] |
|    | <b>HDAC9</b>   |                                                                         | cattle           | male fertility                                                    | male potential<br>fertility   | <i>HDAC9</i> involved in germ cell<br>production                                                          | [116] |
|    | <b>HDAC9</b>   |                                                                         | pig              | birth weight                                                      | pregnancy<br>outcomes         | <i>HDAC9</i> expression effects                                                                           | [117] |

Table S4

|    |                |                                                                                       |                 |                                                                      |                               |                                                             |       |
|----|----------------|---------------------------------------------------------------------------------------|-----------------|----------------------------------------------------------------------|-------------------------------|-------------------------------------------------------------|-------|
|    | <b>HDAC9</b>   |                                                                                       | human/<br>mouse | oocyte function                                                      | female potential<br>fertility | <i>HDAC9</i> expression effects                             | [118] |
|    | <b>HDAC9</b>   |                                                                                       | human           | birth-related<br>myometrial gene<br>expression                       | pregnancy<br>outcomes         | <i>HDAC9</i> expression effects                             | [119] |
| 33 | <b>COL4A1</b>  | Collagen, Type IV,<br>Alpha 1                                                         | pig             | neonate survival                                                     | pregnancy<br>outcomes         | <i>COL4A1</i> expression effects                            | [120] |
|    | <b>COL4A1</b>  |                                                                                       | human           | testis function                                                      | male potential<br>fertility   | <i>COL4A1</i> expression effects                            | [121] |
|    | <b>COL4A1</b>  |                                                                                       | mouse           | folliculogenesis                                                     | female potential<br>fertility | <i>COL4A1</i> expression effects                            | [122] |
|    | <b>COL4A1</b>  |                                                                                       | human           | fetal survival                                                       | fetal/offspring<br>mortality  | <i>COL4A1</i> mutation effects                              | [123] |
|    | <b>COL4A1</b>  |                                                                                       |                 | fetal/placenta<br>growth and<br>development                          | pregnancy<br>outcomes         | <i>COL4A1</i> expression effects                            | [124] |
| 34 | <b>ABHD2</b>   | Abhydrolase Domain<br>Containing 2                                                    |                 | male fertility                                                       | male potential<br>fertility   | <i>ABHD2</i> expression effects                             | [125] |
| 35 | <b>SORT1</b>   | Sortilin 1                                                                            | human           | endometrium<br>functioning                                           | pregnancy<br>outcomes         | <i>SORT1</i> significantly<br>expressed during labour       | [54]  |
|    | <b>SORT1</b>   |                                                                                       |                 | ovarian functioning                                                  | female potential<br>fertility | <i>SORT1</i> significantly up-<br>regulated                 | [126] |
|    | <b>SORT1</b>   |                                                                                       | rat             | ovarian functioning                                                  | female potential<br>fertility | <i>SORT1</i> expression effects                             | [127] |
|    | <b>SORT1</b>   |                                                                                       | human           | embryo implantation                                                  | female potential<br>fertility | <i>SORT1</i> differential expression<br>effects             | [128] |
| 36 | <b>SLC22A5</b> | Solute Carrier Family<br>22 (Organic<br>Cation/Carnitine<br>Transporter), Member<br>5 | mouse           | male infertility                                                     | male potential<br>fertility   | <i>SLC22A5</i> mutation related to<br>male infertility      | [129] |
|    | <b>SLC22A5</b> |                                                                                       | pig             | reproductive<br>variation, offspring<br>born alive and total<br>born | reproductive<br>outcomes      | <i>SLC22A5</i> genotype effects on<br>reproductive capacity | [130] |
|    | <b>SLC22A5</b> |                                                                                       | pig             | age at puberty                                                       | reproductive<br>outcomes      | <i>SLC22A5</i> genotype effects                             | [131] |
| 37 | <b>NOA1</b>    | Nitric Oxide<br>Associated 1                                                          | human           | male fertility,<br>testicular<br>functioning                         | male potential<br>fertility   | <i>NOA1</i> expression effects                              | [132] |
|    | <b>NOA1</b>    |                                                                                       | mouse           | embryo/trophoblast<br>viability                                      | female potential<br>fertility | <i>NOA1</i> -deficient mouse model                          | [133] |
| 38 | <b>LPL</b>     | Lipoprotein Lipase                                                                    | human           | pregnancy<br>complications                                           | pregnancy<br>outcomes         | <i>LPL</i> expression effects                               | [134] |
|    | <b>LPL</b>     |                                                                                       | human           | male infertility                                                     | male potential<br>fertility   | sperm DNA fragmentation<br>related to <i>LPL</i> expression | [135] |
|    | <b>LPL</b>     |                                                                                       | human           | reproductive timing                                                  | reproductive<br>outcomes      | <i>LPL</i> expression effects                               | [7]   |
|    | <b>LPL</b>     |                                                                                       | human           | intrauterine growth<br>restriction                                   | pregnancy<br>outcomes         | <i>LPL</i> -mediated fetal-placental<br>nutrient transfer   | [136] |
|    | <b>LPL</b>     |                                                                                       | human/<br>mouse | placental functioning                                                | pregnancy<br>outcomes         | <i>LPL</i> expression effects                               | [137] |
|    | <b>LPL</b>     |                                                                                       |                 | fetal/placental<br>resource transfer,<br>pregnancy                   | pregnancy<br>outcomes         | <i>LPL</i> expression effects                               | [138] |

Table S4

|    |                                                                          | complications |                                     |                            |                                                              |       |
|----|--------------------------------------------------------------------------|---------------|-------------------------------------|----------------------------|--------------------------------------------------------------|-------|
|    | <i>LPL</i>                                                               | human         | testis/spermatogenesis              | male potential fertility   | <i>LPL</i> expression effects                                | [139] |
|    | <i>LPL</i>                                                               | mouse         | placental regulation of cholesterol | pregnancy outcomes         | <i>LPL</i> involved in maternal-fetal transfer of lipids     | [23]  |
| 39 | <i>COL4A2</i> Collagen, Type IV, Alpha 2                                 | mouse         | fetal viability                     | fetal/offspring mortality  | mouse knockout model for <i>COL4A2</i>                       | [140] |
|    | <i>COL4A2</i>                                                            | human         | testis function                     | male potential fertility   | <i>COL4A2</i> expression effects                             | [121] |
|    | <i>COL4A2</i>                                                            | human         | offspring viability                 | fetal/offspring mortality  | <i>COL4A2</i> expression effects                             | [141] |
| 40 | <i>ADAMST7</i> ADAM Metallopeptidase With Thrombospondin Type 1 Motif, 7 | mouse         | embryogenesis                       | female potential fertility | <i>COL4A2</i> expression effects                             | [142] |
|    | <i>ADAMST7</i>                                                           | dog           | mammary tissue functioning          | reproductive outcomes      | <i>ADAMST7</i> significantly up-regulated in mammary tissues | [143] |
|    | <i>ADAMST7</i>                                                           | human         | breastfeeding capacity              | reproductive outcomes      | <i>ADAMST7</i> expression effects                            | [52]  |

**Table footnotes:****\*'fitness class' column defined further:**

- male potential fertility* - includes processes affecting spermatogenesis, sperm motility, volume or function that ultimately affect probability of successful egg fertilization.
- female potential fertility* - includes processes affecting embryogenesis (i.e. oocyte viability, survival), functioning of uterus (i.e. implantation receptivity, endometrium functioning), placentation (trophoblast cell motility) that ultimately affects initial successful establishment of pregnancy.
- pregnancy outcomes* - includes processes affecting regulation of blood pressure, nutrient and oxygen transfer between fetal and placental tissues during pregnancy that ultimately influences fetal growth, development and survival.
- fetal/offspring mortality* - includes processes linked to pregnancy defects, resistance to pathogens, affecting survival of fetus during pregnancy or perinatal mortality.
- reproductive outcomes* - includes effects on age at maturity, reproductive timing, potential number of offspring, breastfeeding capacity.

**Search criteria:**

- For each CAD gene, Google scholar was used to search for studies using the 'Search terms' (below) and the gene name (*BCAS3* is used as an example)
- For each search, only the first page of results was considered. Search results most consistent with all search terms are ranked by page, thus the most relevant results were always on the first page. This approach was also employed to keep this literature search tractable in terms of time (i.e. a search for each of the terms below for one gene usually took ~1 hour).
- We also used the GWAS Catalog (<https://www.ebi.ac.uk/gwas/>) using the gene name to search for further potential links to fitness related traits

**Search terms (example using gene *BCAS3*):**

- "*BCAS3*" and "reproduction" and gene and "-noncommercial use, distribution, and reproduction in any"
- "*BCAS3*" and "fitness" and gene
- "*BCAS3*" and "fertility" and gene
- "*BCAS3*" and "menarche" and gene
- "*BCAS3*" and "menopause" and gene
- "*BCAS3*" and "birth" or "birth weight"
- "*BCAS3*" and "pregnancy" and gene
- "*BCAS3*" and "placenta" and gene



- "BCAS3" and "implantation" and gene
- "BCAS3" and "oocyte" and gene
- "BCAS3" and "sperm" and gene
- "BCAS3" and "testis"

## References

1. Siva, K., et al., *human BCAS3 expression in embryonic stem cells and vascular precursors suggests a role in human embryogenesis and tumor angiogenesis*. PLoS One, 2007. **2**(11): p. e1202.
2. Zuccotti, M., et al., *Maternal Oct-4 is a potential key regulator of the developmental competence of mouse oocytes*. BMC Developmental Biology, 2008. **8**(1): p. 1-14.
3. Nestler, A., et al., *Blood pressure in pregnancy and magnesium sensitive genes*. Pregnancy Hypertens, 2014. **4**(1): p. 41-5.
4. Gheorghe, C.P., et al., *Gene expression patterns in the hypoxic murine placenta: a role in epigenesis?* Reprod Sci, 2007. **14**(3): p. 223-33.
5. Yuan, H., et al., *A de novo triplication on 2q22.3 including the entire ZEB2 gene associated with global developmental delay, multiple congenital anomalies and behavioral abnormalities*. Mol Cytogenet, 2015. **8**: p. 99.
6. Bao, J.Q., et al., *UPF2, a nonsense-mediated mRNA decay factor, is required for prepubertal Sertoli cell development and male fertility by ensuring fidelity of the transcriptome*. Development, 2015. **142**(2): p. 352-362.
7. Spencer, K.L., et al., *Genetic Variation and Reproductive Timing: African American Women from the Population Architecture Using Genomics and Epidemiology (PAGE) Study*. Plos One, 2013. **8**(2).
8. Kakourou, G., et al., *Investigation of gene expression profiles before and after embryonic genome activation and assessment of functional pathways at the human metaphase II oocyte and blastocyst stage*. Fertility and Sterility, 2013. **99**(3): p. 803-+.
9. Saben, J., et al., *Early growth response protein-1 mediates lipotoxicity-associated placental inflammation: role in maternal obesity*. American Journal of Physiology-Endocrinology and Metabolism, 2013. **305**(1): p. E1-E14.
10. Zhou, L., et al., *Local injury to the endometrium in controlled ovarian hyperstimulation cycles improves implantation rates*. Fertility and Sterility, 2008. **89**(5): p. 1166-1176.
11. Newbold, R.R., et al., *Developmental exposure to diethylstilbestrol alters uterine gene expression that may be associated with uterine neoplasia later in life*. Molecular Carcinogenesis, 2007. **46**(9): p. 783-796.
12. Patel, O.V., et al., *Homeorhetic adaptation to lactation: comparative transcriptome analysis of mammary, liver, and adipose tissue during the transition from pregnancy to lactation in rats*. Functional & Integrative Genomics, 2011. **11**(1): p. 193-202.

13. Farkas, R.M., et al., *The Drosophila Cog5 homologue is required for cytokinesis, cell elongation, and assembly of specialized golgi architecture during spermatogenesis*. *Molecular Biology of the Cell*, 2003. **14**(1): p. 190-200.
14. Foulquier, F., *COG defects, birth and rise!* *Biochimica Et Biophysica Acta-Molecular Basis of Disease*, 2009. **1792**(9): p. 896-902.
15. Solca, C., G.S. Tint, and S.B. Patel, *Dietary xenosterols lead to infertility and loss of abdominal adipose tissue in sterolin-deficient mice*. *Journal of Lipid Research*, 2013. **54**(2): p. 397-409.
16. Dixon, P.H. and C. Williamson, *The pathophysiology of intrahepatic cholestasis of pregnancy*. *Clinics and Research in Hepatology and Gastroenterology*, 2016. **40**(2): p. 141-153.
17. Bi, W.M., et al., *Inactivation of Rai1 in mice recapitulates phenotypes observed in chromosome engineered mouse models for Smith-Magenis syndrome*. *human Molecular Genetics*, 2005. **14**(8): p. 983-995.
18. Girirajan, S. and S.H. Elsea, *Abnormal maternal behavior, altered sociability, and impaired serotonin metabolism in Rai1-transgenic mice*. *Mammalian Genome*, 2009. **20**(4): p. 247-255.
19. Shen, Z., et al., *Estradiol regulation of nucleotidases in female reproductive tract epithelial cells and fibroblasts*. *PLoS One*, 2013. **8**(7): p. e69854.
20. Horikoshi, M., et al., *New loci associated with birth weight identify genetic links between intrauterine growth and adult height and metabolism*. *Nat Genet*, 2013. **45**(1): p. 76-82.
21. Bhasin, K.K., et al., *Maternal low-protein diet or hypercholesterolemia reduces circulating essential amino acids and leads to intrauterine growth restriction*. *Diabetes*, 2009. **58**(3): p. 559-66.
22. Ethier-Chiasson, M., et al., *Influence of maternal lipid profile on placental protein expression of LDLr and SR-BI*. *Biochem Biophys Res Commun*, 2007. **359**(1): p. 8-14.
23. Overbergh, L., et al., *Expression of mouse alpha-macroglobulins, lipoprotein receptor-related protein, LDL receptor, apolipoprotein E, and lipoprotein lipase in pregnancy*. *J Lipid Res*, 1995. **36**(8): p. 1774-86.
24. McLean, M.P., Z. Zhao, and G.C. Ness, *Reduced hepatic LDL-receptor, 3-hydroxy-3-methylglutaryl coenzyme A reductase and sterol carrier protein-2 expression is associated with pregnancy loss in the diabetic rat*. *Endocrine*, 1995. **3**(10): p. 695-703.
25. Yeung, C.H. and T.G. Cooper, *Potassium channels involved in human sperm volume regulation--quantitative studies at the protein and mRNA levels*. *Mol Reprod Dev*, 2008. **75**(4): p. 659-68.
26. Cooper, T.G. and C.H. Yeung, *Involvement of potassium and chloride channels and other transporters in volume regulation by spermatozoa*. *Curr Pharm Des*, 2007. **13**(31): p. 3222-30.
27. Barfield, J.P., C.H. Yeung, and T.G. Cooper, *Characterization of potassium channels involved in volume regulation of human spermatozoa*. *Mol Hum Reprod*, 2005. **11**(12): p. 891-7.
28. Chow, G.E., et al., *Expression of two-pore domain potassium channels in nonhuman primate sperm*. *Fertil Steril*, 2007. **87**(2): p. 397-404.

29. Kang, D., et al., *TASK-2 Expression Levels are Increased in mouse Cryopreserved Ovaries*. Journal of Embryo Transfer, 2015. **30**(4): p. 277-282.
30. Wang, M., et al., *MicroRNA expression patterns in the bovine mammary gland are affected by stage of lactation*. J Dairy Sci, 2012. **95**(11): p. 6529-35.
31. Gloria-Bottini, F., et al., *Effect of smoking and ABO blood groups on maternal age at child bearing and on birth weight*. European Journal of Obstetrics & Gynecology and Reproductive Biology, 2011. **159**(1): p. 83-86.
32. Clark, P. and I.A. Greer, *The influence of maternal Lewis, Secretor and ABO(H) blood groups on fetal growth restriction*. J Thromb Haemost, 2011. **9**(12): p. 2411-5.
33. Dean, L., *Hemolytic disease of the newborn*, in *Hemolytic disease of the newborn*, L. Dean, Editor. 2005, National Center for Biotechnology Information (NCBI), National Library of Medicine, National Institutes of Health: Bethesda, MD.
34. Pathirana, S.L., et al., *ABO-blood-group types and protection against severe, Plasmodium falciparum malaria*. Ann Trop Med Parasitol, 2005. **99**(2): p. 119-24.
35. Balgir, R.S., *Menarcheal age in relation to ABO blood group phenotypes and haemoglobin-E genotypes*. J Assoc Physicians India, 1993. **41**(4): p. 210-1.
36. Omu, A.E., M. Al-Mutawa, and F. Al-Qattan, *ABO blood group and expression of antisperm antibodies in infertile couples in Kuwait*. Gynecol Obstet Invest, 1998. **45**(1): p. 49-53.
37. Franchini, M., C. Mengoli, and G. Lippi, *Relationship between ABO blood group and pregnancy complications: a systematic literature analysis*. Blood Transfusion, 2016. **5**: p. 1-8.
38. Mengoli, C., et al., *ABO blood group and fertility: a single-centre study*. Blood Transfus, 2015. **13**(3): p. 521-3.
39. Liu, J., et al., *Expression of SWAP-70 in the uterus and feto-maternal interface during embryonic implantation and pregnancy in the rhesus monkey (Macaca mulatta)*. Histochem Cell Biol, 2006. **126**(6): p. 695-704.
40. Sitras, V., C. Fenton, and G. Acharya, *Gene expression profile in cardiovascular disease and preeclampsia: a meta-analysis of the transcriptome based on raw data from human studies deposited in Gene Expression Omnibus*. Placenta, 2015. **36**(2): p. 170-8.
41. Padidela, R., *Effects of polymorphisms in the growth hormone and insulin-like growth factor axis on intrauterine and postnatal growth*. 2013, University College London.
42. Slack, C., et al., *Regulation of lifespan, metabolism, and stress responses by the Drosophila SH2B protein, Lnk*. PLoS Genet, 2010. **6**(3): p. e1000881.
43. Hogeveen, M., et al., *Umbilical choline and related methylamines betaine and dimethylglycine in relation to birth weight*. Pediatr Res, 2013. **73**(6): p. 783-7.
44. Zhu, J., *Choline Intake During Pregnancy and Genetic Polymorphisms Influence Choline Metabolism in Chinese Preterms Receiving Total Parenteral Nutrition Therapy* The FASEB Journal, 2016. **30**.

45. Lazaros, L., et al., *Phosphatidylethanolamine N-methyltransferase and choline dehydrogenase gene polymorphisms are associated with human sperm concentration*. Asian J Androl, 2012. **14**(5): p. 778-83.
46. Khot, V., et al., *Expression of genes encoding enzymes involved in the one carbon cycle in rat placenta is determined by maternal micronutrients (folic acid, vitamin B12) and omega-3 fatty acids*. Biomed Res Int, 2014. **2014**: p. 613078.
47. Cheng, E.H., et al., *Requirement of Leukemia Inhibitory Factor or Epidermal Growth Factor for Pre-Implantation Embryogenesis via JAK/STAT3 Signaling Pathways*. PLoS One, 2016. **11**(4): p. e0153086.
48. Yan, J., et al., *Pregnancy alters choline dynamics: results of a randomized trial using stable isotope methodology in pregnant and nonpregnant women*. Am J Clin Nutr, 2013. **98**(6): p. 1459-67.
49. Gong, W., et al., *Transcriptome profiling of the developing postnatal mouse testis using next-generation sequencing*. Sci China Life Sci, 2013. **56**(1): p. 1-12.
50. Cloke, B., et al., *The androgen and progesterone receptors regulate distinct gene networks and cellular functions in decidualizing endometrium*. Endocrinology, 2008. **149**(9): p. 4462-74.
51. Palmqvist, L., et al., *Correlation of murine embryonic stem cell gene expression profiles with functional measures of pluripotency*. Stem Cells, 2005. **23**(5): p. 663-80.
52. Colodro-Conde, L., et al., *A twin study of breastfeeding with a preliminary genome-wide association scan*. Twin Res Hum Genet, 2015. **18**(1): p. 61-72.
53. Huang, C.-W., et al., *Efficient SNP Discovery by Combining Microarray and Lab-on-a-Chip Data for Animal Breeding and Selection*. Microarrays, 2015. **4**(4): p. 570-595.
54. Chan, Y.W., et al., *Assessment of myometrial transcriptome changes associated with spontaneous human labour by high-throughput RNA-seq*. Exp Physiol, 2014. **99**(3): p. 510-24.
55. Fledel-Alon, A., et al., *Variation in human recombination rates and its genetic determinants*. PLoS One, 2011. **6**(6): p. e20321.
56. Perez-Montarelo, D., et al., *Identification of genes regulating growth and fatness traits in pig through hypothalamic transcriptome analysis*. Physiological Genomics, 2014. **46**(6): p. 195-206.
57. Aghajanova, L., et al., *Comparative Transcriptome Analysis of human Trophectoderm and Embryonic Stem Cell-Derived Trophoblasts Reveal Key Participants in Early Implantation*. Biology of Reproduction, 2012. **86**(1).
58. Ponsuksili, S., et al., *Gene Expression and DNA-Methylation of Bovine Pretransfer Endometrium Depending on Its Receptivity after In Vitro-Produced Embryo Transfer*. Plos One, 2012. **7**(8).
59. Duzyj, C.M., et al., *PreImplantation factor (PIF\*) promotes embryotrophic and neuroprotective decidual genes: effect negated by epidermal growth factor*. Journal of Neurodevelopmental Disorders, 2014. **6**.
60. Sedlmeier, E.M., et al., *human placental transcriptome shows sexually dimorphic gene expression and responsiveness to maternal dietary n-3 long-*

- chain polyunsaturated fatty acid intervention during pregnancy. BMC Genomics, 2014. 15.*
61. Taal, H.R., *Early Growth, Cardiovascular and Renal Development - The Generation R Study.* 2013, Erasmus University: Rotterdam.
  62. Horikoshi, M., et al., *New loci associated with birth weight identify genetic links between intrauterine growth and adult height and metabolism.* Nature Genetics, 2013. **45**(1): p. 76-U115.
  63. Pagliardini, L., et al., *Replication and meta-analysis of previous genome-wide association studies confirm vezatin as the locus with the strongest evidence for association with endometriosis.* human Reproduction, 2015. **30**(4): p. 987-993.
  64. Sayed, A.-R.A.A.-R., *Molecular genetic studies in pregnancies affected by preeclampsia and intrauterine growth restriction, in School of Molecular Medical Sciences.* 2011, University of Nottingham: United Kingdom.
  65. Moore, S.G., et al., *Differentially Expressed Genes in Endometrium and Corpus Luteum of Holstein Cows Selected for High and Low Fertility Are Enriched for Sequence Variants Associated with Fertility.* Biol Reprod, 2016. **94**(1): p. 19.
  66. Gad, A.Y.M.H., *Transcriptome profiling of bovine blastocysts developed under alternative culture conditions during specific stages of development.* 2012, University of Bonn: Bonn, Germany.
  67. Tuttelmann, F., et al., *Copy number variants in patients with severe oligozoospermia and Sertoli-cell-only syndrome.* PLoS One, 2011. **6**(4): p. e19426.
  68. Scotti, L., et al., *Platelet-derived growth factor BB and DD and angiopoietin1 are altered in follicular fluid from polycystic ovary syndrome patients.* Mol Reprod Dev, 2014. **81**(8): p. 748-56.
  69. Bonnet, A., et al., *Spatio-Temporal Gene Expression Profiling during In Vivo Early Ovarian Folliculogenesis: Integrated Transcriptomic Study and Molecular Signature of Early Follicular Growth.* PLoS One, 2015. **10**(11): p. e0141482.
  70. Sharov, A.A., et al., *Effects of aging and calorie restriction on the global gene expression profiles of mouse testis and ovary.* BMC Biol, 2008. **6**: p. 24.
  71. Popovici, R.M., et al., *Gene expression profiling of human endometrial-trophoblast interaction in a coculture model.* Endocrinology, 2006. **147**(12): p. 5662-5675.
  72. Sleer, L.S. and C.C. Taylor, *Cell-type localization of platelet-derived growth factors and receptors in the postnatal rat ovary and follicle.* Biol Reprod, 2007. **76**(3): p. 379-90.
  73. Sitras, V., et al., *Differential placental gene expression in severe preeclampsia.* Placenta, 2009. **30**(5): p. 424-33.
  74. Moretti, E., et al., *Ultrastructural study of spermatogenesis in KSR2 deficient mice.* Transgenic Res, 2015. **24**(4): p. 741-51.
  75. Cerny, K.L., et al., *A transcriptomal analysis of bovine oviductal epithelial cells collected during the follicular phase versus the luteal phase of the estrous cycle.* Reprod Biol Endocrinol, 2015. **13**: p. 84.
  76. Henry, M.D., et al., *Obesity-dependent dysregulation of glucose homeostasis in kinase suppressor of ras 2-/- mice.* Physiol Rep, 2014. **2**(7).

77. Kaipainen, A., et al., *The Related Flt4, Flt1, and Kdr Receptor Tyrosine Kinases Show Distinct Expression Patterns in human Fetal Endothelial-Cells*. Journal of Experimental Medicine, 1993. **178**(6): p. 2077-2088.
78. Khankin, E.V., et al., *Hemodynamic, Vascular, and Reproductive Impact of FMS-Like Tyrosine Kinase 1 (FLT1) Blockade on the Uteroplacental Circulation During Normal mouse Pregnancy*. Biology of Reproduction, 2012. **86**(2).
79. Muehlenbachs, A., et al., *Natural selection of FLT1 alleles and their association with malaria resistance in utero*. Proceedings of the National Academy of Sciences of the United States of America, 2008. **105**(38): p. 14488-14491.
80. Bonnet, A., et al., *An overview of gene expression dynamics during early ovarian folliculogenesis: specificity of follicular compartments and bi-directional dialog*. BMC Genomics, 2013. **14**.
81. Fritz, R., *Trophoblast Retrieval And Isolation From The Cervix (tric) For Non-Invasive Prenatal Genetic Diagnosis And Prediction Of Abnormal Pregnancy Outcome*, in *Physiology*. 2015, Wayne State University.
82. Korevaar, T.I., et al., *Soluble Flt1 and placental growth factor are novel determinants of newborn thyroid (dys)function: the generation R study*. J Clin Endocrinol Metab, 2014. **99**(9): p. E1627-34.
83. Dan, S., L. Haibo, and L. Hong, *Pathogenesis and stem cell therapy for premature ovarian failure*. OA Stem Cells, 2014. **10**(2).
84. Dey, S.K., et al., *Molecular cues to implantation*. Endocr Rev, 2004. **25**(3): p. 341-73.
85. Sood, R., et al., *Gene expression patterns in human placenta*. Proc Natl Acad Sci U S A, 2006. **103**(14): p. 5478-83.
86. Tsao, P.N., et al., *Excess soluble fms-like tyrosine kinase 1 and low platelet counts in premature neonates of preeclamptic mothers*. Pediatrics, 2005. **116**(2): p. 468-72.
87. Chen, L.H., et al., *[Effects of intrauterine growth restriction and high-fat diet on serum lipid and transcriptional levels of related hepatic genes in rats]*. Zhongguo Dang Dai Er Ke Za Zhi, 2015. **17**(10): p. 1124-30.
88. Ozawa, M., et al., *Global gene expression of the inner cell mass and trophectoderm of the bovine blastocyst*. BMC Dev Biol, 2012. **12**: p. 33.
89. Archambeault, D.R. and M.M. Matzuk, *Disrupting the male germ line to find infertility and contraception targets*. Ann Endocrinol (Paris), 2014. **75**(2): p. 101-8.
90. Niklaus, A.L. and J.W. Pollard, *Mining the mouse transcriptome of receptive endometrium reveals distinct molecular signatures for the luminal and glandular epithelium*. Endocrinology, 2006. **147**(7): p. 3375-90.
91. Xu, J., J. Oakley, and E.A. McGee, *Stage-specific expression of Smad2 and Smad3 during folliculogenesis*. Biol Reprod, 2002. **66**(6): p. 1571-8.
92. Ethier, J.F. and J.K. Findlay, *Roles of activin and its signal transduction mechanisms in reproductive tissues*. Reproduction, 2001. **121**(5): p. 667-75.
93. Matsuda, T., et al., *Cross-talk between transforming growth factor-beta and estrogen receptor signaling through Smad3*. Journal of Biological Chemistry, 2001. **276**(46): p. 42908-42914.

94. Xu, R., et al., *Developmental and stage-specific expression of Smad2 and Smad3 in rat testis*. Journal of Andrology, 2003. **24**(2): p. 192-200.
95. Pyun, J.A., et al., *Genome-wide association studies and epistasis analyses of candidate genes related to age at menarche and age at natural menopause in a Korean population*. Menopause-the Journal of the North American Menopause Society, 2014. **21**(5): p. 522-529.
96. Mbarek, H., et al., *Identification of Common Genetic Variants Influencing Spontaneous Dizygotic Twinning and Female Fertility*. American Journal of human Genetics, 2016. **98**(5): p. 898-908.
97. Liu, Y.X., et al., *Effects of Smad3 on the Proliferation and Steroidogenesis in human Ovarian Luteinized Granulosa Cells*. Iubmb Life, 2014. **66**(6): p. 424-437.
98. Dunn, N.R., et al., *Combinatorial activities of Smad2 and Smad3 regulate mesoderm formation and patterning in the mouse embryo*. Development, 2004. **131**(8): p. 1717-1728.
99. Itman, C., et al., *Smad3 Dosage Determines Androgen Responsiveness and Sets the Pace of Postnatal Testis Development*. Endocrinology, 2011. **152**(5): p. 2076-2089.
100. Jacob, S. and K.H. Moley, *Gametes and embryo epigenetic reprogramming affect developmental outcome: Implication for assisted reproductive technologies*. Pediatric Research, 2005. **58**(3): p. 437-446.
101. Nelissen, E.C.M., et al., *Epigenetics and the placenta*. human Reproduction Update, 2011. **17**(3): p. 397-417.
102. Monk, D., et al., *Limited evolutionary conservation of imprinting in the human placenta*. Proceedings of the National Academy of Sciences of the United States of America, 2006. **103**(17): p. 6623-6628.
103. Johnson, R., et al., *REST Regulates Distinct Transcriptional Networks in Embryonic and Neural Stem Cells*. Plos Biology, 2008. **6**(10): p. 2205-2219.
104. Burney, R.O., et al., *Gene expression analysis of endometrium reveals progesterone resistance and candidate susceptibility genes in women with endometriosis*. Endocrinology, 2007. **148**(8): p. 3814-3826.
105. Chalmel, F., et al., *The conserved transcriptome in human and rodent male gametogenesis*. Proceedings of the National Academy of Sciences of the United States of America, 2007. **104**(20): p. 8346-8351.
106. Pokharel, K., et al., *Transcriptome profiling of Finnsheep ovaries during out-of-season breeding period*. Agricultural and Food Science, 2015. **24**(1): p. 1-9.
107. Yan, Y.H., et al., *Screening for preeclampsia pathogenesis related genes*. European Review for Medical and Pharmacological Sciences, 2013. **17**(22): p. 3083-3094.
108. Liu, N., et al., *Genome-wide Gene Expression Profiling Reveals Aberrant MAPK and Wnt Signaling Pathways Associated with Early Parthenogenesis*. Journal of Molecular Cell Biology, 2010. **2**(6): p. 333-344.
109. Hatzirodos, N., et al., *Transcriptome profiling of granulosa cells from bovine ovarian follicles during atresia*. BMC Genomics, 2014. **15**.

110. Moore, A.C. and A. Sutherland, *Characterizing the Nature of the Xst199 Mutation and the Normal Function of the TANGO1 Protein in Trophoblast Cells*. *Faseb Journal*, 2011. **25**.
111. Ostrup, E., et al., *Differential Endometrial Gene Expression in Pregnant and Nonpregnant Sows*. *Biology of Reproduction*, 2010. **83**(2): p. 277-285.
112. Mansouri-Attia, N., et al., *Endometrium as an early sensor of in vitro embryo manipulation technologies*. *Proceedings of the National Academy of Sciences of the United States of America*, 2009. **106**(14): p. 5687-5692.
113. Yan, L., et al., *Expression of apoptosis-related genes in the endometrium of polycystic ovary syndrome patients during the window of implantation*. *Gene*, 2012. **506**(2): p. 350-354.
114. Anum, E.A., et al., *Genetic Contributions to Disparities in Preterm Birth*. *Pediatric Research*, 2009. **65**(1): p. 1-9.
115. Zhang, P., et al., *Distinct sets of developmentally regulated genes that are expressed by human oocytes and human embryonic stem cells*. *Fertility and Sterility*, 2007. **87**(3): p. 677-690.
116. Hering, D.M., K. Olenski, and S. Kaminski, *Genome-Wide Association Study for Sperm Concentration in Holstein-Friesian Bulls*. *Reproduction in Domestic Animals*, 2014. **49**(6): p. 1008-1014.
117. Zhang, L.F., et al., *Genome Wide Screening of Candidate Genes for Improving piglet Birth Weight Using High and Low Estimated Breeding Value Populations*. *International Journal of Biological Sciences*, 2014. **10**(3): p. 236-244.
118. Assou, S., et al., *The human cumulus-oocyte complex gene-expression profile*. *human Reproduction*, 2006. **21**(7): p. 1705-1719.
119. Chan, Y.W., et al., *Assessment of myometrial transcriptome changes associated with spontaneous human labour by high-throughput RNA-seq*. *Experimental Physiology*, 2014. **99**(3): p. 510-524.
120. Jiang, L., et al., *Expression of X-linked genes in deceased Neonates and surviving cloned female piglets*. *Molecular Reproduction and Development*, 2008. **75**(2): p. 265-273.
121. Chen, S.R., et al., *The Wilms Tumor Gene, Wt1, Maintains Testicular Cord Integrity by Regulating the Expression of Col4a1 and Col4a2*. *Biology of Reproduction*, 2013. **88**(3).
122. Borup, R., et al., *Competence Classification of Cumulus and Granulosa Cell Transcriptome in Embryos Matched by Morphology and Female Age*. *Plos One*, 2016. **11**(4).
123. Garel, C., et al., *Fetal intracerebral hemorrhage and COL4A1 mutation: promise and uncertainty*. *Ultrasound in Obstetrics & Gynecology*, 2013. **41**(2): p. 228-230.
124. Rodriguez-Zas, S.L., K. Schellander, and H.A. Lewin, *Biological interpretations of transcriptomic profiles in mammalian oocytes and embryos*. *Reproduction*, 2008. **135**(2): p. 129-139.
125. Gerhardt, K., *Progesterone and Endocannabinoid Interaction Alters Sperm Activation*. *Biol Reprod*, 2016. **95**(1): p. 9.



126. Zhao, Y., et al., *Effect of luteal-phase support on endometrial microRNA expression following controlled ovarian stimulation*. *Reprod Biol Endocrinol*, 2012. **10**: p. 72.
127. Wang, C.Q. and L.-S. Ll, *Effect of CdCl<sub>2</sub> on Expression of Sortilin(Sort1) in rat Ovary*. *Reproduction and Contraception*, 2012. **7**.
128. Aghajanova, L., et al., *Comparative transcriptome analysis of human trophoctoderm and embryonic stem cell-derived trophoblasts reveal key participants in early implantation*. *Biol Reprod*, 2012. **86**(1): p. 1-21.
129. Toshimori, K., et al., *Dysfunctions of the epididymis as a result of primary carnitine deficiency in juvenile visceral steatosis mice*. *Febs Letters*, 1999. **446**(2-3): p. 323-326.
130. Mote, B.E., et al., *Identification of genetic markers for productive life in commercial sows*. *Journal of Animal Science*, 2009. **87**(7): p. 2187-2195.
131. Rempel, L.A., et al., *Association analyses of candidate single nucleotide polymorphisms on reproductive traits in swine*. *Journal of Animal Science*, 2010. **88**(1): p. 1-15.
132. Okada, H., et al., *Genome-wide expression of azoospermia testes demonstrates a specific profile and implicates ART3 in genetic susceptibility*. *Plos Genetics*, 2008. **4**(2).
133. Kolanczyk, M., et al., *NOA1 is an essential GTPase required for mitochondrial protein synthesis*. *Molecular Biology of the Cell*, 2011. **22**(1): p. 1-11.
134. Schmella, M.J., et al., *The-93T/G LPL Promoter Polymorphism Is Associated With Lower Third-Trimester Triglycerides in Pregnant African American Women*. *Biological Research for Nursing*, 2015. **17**(4): p. 429-437.
135. Intasqui, P., et al., *Sperm nuclear DNA fragmentation rate is associated with differential protein expression and enriched functions in human seminal plasma*. *Bju International*, 2013. **112**(6): p. 835-843.
136. Tabano, S., et al., *Placental LPL gene expression is increased in severe intrauterine growth-restricted pregnancies*. *Pediatric Research*, 2006. **59**(2): p. 250-253.
137. Lindegaard, M.L.S., et al., *Endothelial and lipoprotein lipases in human and mouse placenta*. *Journal of Lipid Research*, 2005. **46**(11): p. 2339-2346.
138. Lager, S. and T.L. Powell, *Regulation of nutrient transport across the placenta*. *J Pregnancy*, 2012. **2012**: p. 179827.
139. Nielsen, J.E., et al., *Lipoprotein lipase and endothelial lipase in human testis and in germ cell neoplasms*. *Int J Androl*, 2010. **33**(1): p. e207-15.
140. Kuo, D.S., C. Labelle-Dumais, and D.B. Gould, *COL4A1 and COL4A2 mutations and disease: insights into pathogenic mechanisms and potential therapeutic targets*. *human Molecular Genetics*, 2012. **21**: p. R97-R110.
141. Yoneda, Y., et al., *De novo and inherited mutations in COL4A2, encoding the type IV collagen alpha2 chain cause porencephaly*. *Am J Hum Genet*, 2012. **90**(1): p. 86-90.
142. Hurskainen, T.L., et al., *ADAM-TS5, ADAM-TS6, and ADAM-TS7, novel members of a new family of zinc metalloproteases. General features and genomic distribution of the ADAM-TS family*. *J Biol Chem*, 1999. **274**(36): p. 25555-63.

143. Rao, N.A., et al., *Gene expression profiles of progestin-induced canine mammary hyperplasia and spontaneous mammary tumors*. J Physiol Pharmacol, 2009. **60 Suppl 1**: p. 73-84.
